# Supplementary material
Source: Springer Nature journal article supplement (https://www.springermedizin.de/resource/supplementary/13000_2013_936_MOESM5_ESM.pdf/9625742)

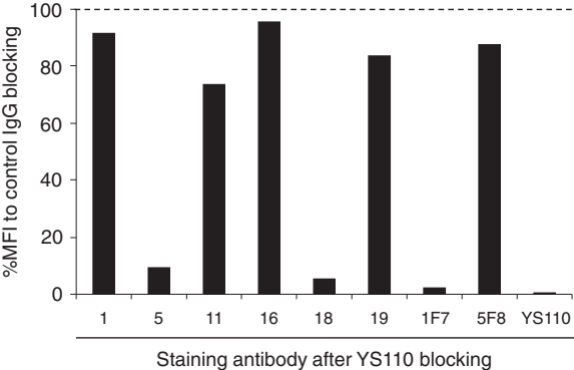

Supplement: MOESM5 [file 9625742]
